# Supplementary material for: Delineating the dynamic evolution from preneoplasia to invasive lung adenocarcinoma by integrating single-cell RNA sequencing and spatial transcriptomics
Source: Springer Nature journal article supplement (doi:10.1038/s12276-022-00896-9), 2022-11-25
Supplement: MOESM1 [file 12276_2022_896_MOESM1_ESM.pdf]

## Supplementary tables

Supplementary table 1. Clinical characteristics of patients with LUAD from whom scRNA-seq and ST data were obtained.

| No. | Gender | Age | Smoking status | Tumor location   | Tumor diameter | Radiological type | Histological type |
|-----|--------|-----|----------------|------------------|----------------|-------------------|-------------------|
| TD1 | Female | 57  | Never          | Left upper lobe  | 17mm           | SN                | IAC               |
| TD2 | Male   | 47  | Never          | Right lower lobe | 20mm           | SN                | IAC               |
| TD3 | Male   | 37  | Never          | Left upper lobe  | 10mm           | pGGN              | MIA               |
| TD4 | Female | 45  | Never          | Left upper lobe  | 12mm           | pGGN              | MIA               |
| TD5 | Female | 56  | Never          | Left upper lobe  | 16mm           | SSN               | AIS               |
| TD6 | Female | 56  | Never          | Right upper lobe | 21mm           | SSN               | MIA               |
| TD7 | Female | 40  | Never          | Left lower lobe  | 8mm            | SSN               | AIS               |
| TD8 | Male   | 69  | Ever           | Left upper lobe  | 7mm            | pGGN              | AIS               |
| TD9 | Female | 62  | Never          | Right upper lobe | 15mm           | SSN               | IAC               |

Supplementary table 2. List of marker genes for major six types of cells.

| Cell type    | Epithelial cells | T/NK cells | Myeloid cells | B cells | Endothelial cells | Fibroblasts |
|--------------|------------------|------------|---------------|---------|-------------------|-------------|
| Marker genes | CAPS             | GZMK       | LYZ           | JCHAIN  | CLDN5             | DCN         |
|              | SCGB1A1          | GZMB       | CTSD          | IGHM    | RAMP2             | LUM         |
|              | WFDC2            | NKG7       | CCL18         | IGHG1   | CAV1              | COL1A2      |
|              | KRT8             | GNLY       | CD68          | IGHA1   | VWF               | COL3A1      |
|              | KRT19            | KLRD1      | CD14          | IGHG4   | PECAM1            | COL1A1      |
|              | SCGB3A1          | KLRC1      | HLA-DRA       | IGHA2   | CDH5              | FN1         |
|              | SCGB3A2          | TIGIT      | HLA-DRB1      | IGHG3   | EMCN              | COL6A2      |
|              | KRT18            | LTB        | TNF           | IGHG2   | CD34              | COL6A3      |
|              | EPCAM            | TNFRSF4    | FCGR3A        | MZB1    | CD31              | ACTA2       |
|              | MUC1             | TNFRSF18   | CD63          | IGHD    | THBD              | COL6A1      |
|              | SFTPC            | IL2RA      | CD163         | CD79A   |                   | COL5A2      |
|              | SFTPA1           | GZMH       | FCGR2A        | MS4A1   |                   | COL4A2      |
|              | SFTPA2           | CD3D       | TPSB2         |         |                   |             |
|              | SFTPB            | FOXP3      | TPSAB1        |         |                   |             |
|              | PGC              |            | CPA3          |         |                   |             |
|              | AGER             |            | HPGDS         |         |                   |             |
|              | CAV1             |            | MS4A2         |         |                   |             |
|              | CYP4B1           |            | AIF1          |         |                   |             |

|       |          |
|-------|----------|
| KRT7  | IL1RN    |
| ID1   | CD86     |
| SFTPD | THBD     |
| CDH1  | S100A9   |
|       | S100A8   |
|       | CXCL8    |
|       | FCGR3B   |
|       | IL1RN    |
|       | PTGS2    |
|       | CD1E     |
|       | FCGR2A   |
|       | THBD     |
|       | HLA-DPB1 |
|       | CD1C     |
|       | CD40     |

Supplementary table 3. Clinicopathological characteristics of patients with early LUAD verified by IF analysis.

| Variable                |    | Histological type |    |         |    |         | P value |
|-------------------------|----|-------------------|----|---------|----|---------|---------|
|                         | n  | AIS(14)           | n  | MIA(18) | n  | IAC(17) |         |
| Gender                  |    |                   |    |         |    |         | 0.573   |
| Male                    | 5  |                   | 7  |         | 8  |         |         |
| Female                  | 9  |                   | 11 |         | 9  |         |         |
| Age                     |    |                   |    |         |    |         | 0.794   |
| ≥65                     | 2  |                   | 4  |         | 4  |         |         |
| <65                     | 12 |                   | 14 |         | 13 |         |         |
| Smoking status          |    |                   |    |         |    |         | 0.100   |
| Never                   | 12 |                   | 14 |         | 9  |         |         |
| Ever                    | 2  |                   | 4  |         | 8  |         |         |
| Family history of tumor |    |                   |    |         |    |         | 0.178   |
| Absent                  | 13 |                   | 13 |         | 11 |         |         |
| Present                 | 1  |                   | 5  |         | 6  |         |         |
| Tumor diameter          |    |                   |    |         |    |         | 0.092   |
| 0-10mm                  | 5  |                   | 1  |         | 1  |         |         |
| 10-20mm                 | 6  |                   | 13 |         | 11 |         |         |
| 20-30mm                 | 3  |                   | 3  |         | 5  |         |         |
| Tumor location          |    |                   |    |         |    |         | 0.781   |
| RUL                     | 5  |                   | 6  |         | 6  |         |         |
| RML                     | 1  |                   | 1  |         | 0  |         |         |

|                   |   |    |    |         |
|-------------------|---|----|----|---------|
| RLL               | 2 | 4  | 3  |         |
| LUL               | 4 | 5  | 8  |         |
| LLL               | 2 | 2  | 0  |         |
| Radiological type |   |    |    | < 0.001 |
| pGGN              | 7 | 4  | 1  |         |
| SSN               | 6 | 14 | 8  |         |
| SN                | 1 | 0  | 8  |         |
| Surgical approach |   |    |    | 0.005   |
| Lobectomy         | 7 | 8  | 16 |         |
| Sub-lobectomy     | 7 | 10 | 1  |         |

Supplementary table 4. Clinicopathological characteristics of patients with early LUAD verified by bulk RNA-seq.

| Variable                |    | Histological type |    |         | P value |
|-------------------------|----|-------------------|----|---------|---------|
|                         | n  | AIS(20)           | n  | MIA(17) |         |
| Gender                  |    |                   |    |         | 0.377   |
| Male                    | 4  |                   | 6  |         |         |
| Female                  | 16 |                   | 11 |         |         |
| Age                     |    |                   |    |         | 0.323   |
| ≥65                     | 3  |                   | 4  |         |         |
| < 65                    | 17 |                   | 13 |         |         |
| Smoking status          |    |                   |    |         | 0.490   |
| Never                   | 17 |                   | 13 |         |         |
| Ever                    | 3  |                   | 4  |         |         |
| Family history of tumor |    |                   |    |         | 0.021   |
| Absent                  | 14 |                   | 13 |         |         |
| Present                 | 6  |                   | 4  |         |         |
| Tumor diameter          |    |                   |    |         | < 0.001 |
| 0-10mm                  | 9  |                   | 3  |         |         |
| 10-20mm                 | 8  |                   | 13 |         |         |
| 20-30mm                 | 3  |                   | 1  |         |         |
| Tumor location          |    |                   |    |         | 0.012   |
| RUL                     | 8  |                   | 5  |         |         |
| RML                     | 0  |                   | 3  |         |         |
| RLL                     | 2  |                   | 0  |         |         |
| LUL                     | 4  |                   | 8  |         |         |
| LLL                     | 6  |                   | 1  |         |         |

|                   |    |    |    |         |
|-------------------|----|----|----|---------|
| Radiological type |    |    |    | < 0.001 |
| pGGN              | 7  | 4  | 0  |         |
| SSN               | 13 | 13 | 12 |         |
| SN                | 0  | 0  | 11 |         |
| Surgical approach |    |    |    | < 0.001 |
| Lobectomy         | 3  | 10 | 20 |         |
| Sub-lobectomy     | 17 | 7  | 3  |         |

Supplementary table 5. The reproducibility of scRNA-seq data across nine patient donors through irreproducible discovery rate (IDR) analysis.

| Cell type  | Cell subtype                  | Group | Marker gene | Irreproducible Discovery Rate |
|------------|-------------------------------|-------|-------------|-------------------------------|
| Epithelial | TM4SF1+ cancer cells (Epi-C0) | AIS   | TM4SF1      | 4.48E-06                      |
|            | TM4SF1+ cancer cells (Epi-C0) | MIA   | TM4SF1      | 4.06E-05                      |
|            | TM4SF1+ cancer cells (Epi-C0) | IAC   | TM4SF1      | 0.00097041                    |
|            | CRABP2+ cancer cells (Epi-C3) | AIS   | CRABP2      | 0.266227814                   |
|            | CRABP2+ cancer cells (Epi-C3) | MIA   | CRABP2      | 0.090658529                   |
|            | CRABP2+ cancer cells (Epi-C3) | IAC   | CRABP2      | 0.019398353                   |
|            | UBE2C+ cancer cells (Epi-C6)  | IAC   | UBE2C       | 0.003198881                   |
| T/NK       | NK (T/NK-C4: GNLY+)           | AIS   | GNLY        | 7.77E-16                      |
|            | NK (T/NK-C4: GNLY+)           | MIA   | GNLY        | 2.05E-13                      |
|            | NK (T/NK-C4: GNLY+)           | IAC   | GNLY        | 8.10E-11                      |
|            | Treg (T/NK-C6: FOXP3+)        | AIS   | FOXP3       | 0.000171547                   |
|            | Treg (T/NK-C6: FOXP3+)        | MIA   | FOXP3       | 6.86E-08                      |
|            | Treg (T/NK-C6: FOXP3+)        | IAC   | FOXP3       | 2.87E-10                      |
|            | Mast cells (Myc-C0:           | AIS   | TPSB2       | 0                             |
| Myeloid    |                               |       |             |                               |

|                   |                                             |     |       |  |             |
|-------------------|---------------------------------------------|-----|-------|--|-------------|
|                   | TPSB2+)                                     |     |       |  |             |
|                   | Mast cells                                  |     |       |  |             |
|                   | (Mye-C0: TPSB2+)                            | MIA | TPSB2 |  | 4.97E-06    |
|                   | Mast cells                                  |     |       |  |             |
|                   | (Mye-C0: TPSB2+)                            | IAC | TPSB2 |  | 5.62E-05    |
|                   | Monocytes                                   |     |       |  |             |
|                   | (Mye-C7: FCN1+)                             | AIS | FCN1  |  | 2.59E-05    |
|                   | Monocytes                                   |     |       |  |             |
|                   | (Mye-C7: FCN1+)                             | MIA | FCN1  |  | 0.024205964 |
|                   | Monocytes                                   |     |       |  |             |
|                   | (Mye-C7: FCN1+)                             | IAC | FCN1  |  | 0.365352387 |
| B cells           | MALT B cells (C4: IGHD+)                    | AIS | IGHD  |  | 0.775010024 |
|                   | MALT B cells (C4: IGHD+)                    | IAC | IGHD  |  | 0.87832332  |
|                   | Secretory B cells (C7: GZMB+)               | AIS | GZMB  |  | 0.055846255 |
|                   | Secretory B cells (C7: GZMB+)               | MIA | GZMB  |  | 0.042646208 |
|                   | Secretory B cells (C7: GZMB+)               | IAC | GZMB  |  | 0.000380491 |
| Endothelial cells | Lymphatic endothelial cells (End-C4: PDPN+) | AIS | PDPN  |  | 1.13E-09    |
|                   | Lymphatic endothelial cells (End-C4: PDPN+) | MIA | PDPN  |  | 1.15E-08    |
|                   | Lymphatic endothelial cells (End-C4: PDPN+) | IAC | PDPN  |  | 0           |
| Fibroblast        | Cancer-associated fibroblast (Fib-C1)       | AIS | FAP   |  | 0.000481336 |
|                   | Cancer-associated fibroblast (Fib-C1)       | MIA | FAP   |  | 2.74E-07    |

|                                             |     |     |             |
|---------------------------------------------|-----|-----|-------------|
| Cancer-associated<br>fibroblast<br>(Fib-C1) | IAC | FAP | 0.001128006 |
|---------------------------------------------|-----|-----|-------------|

Supplementary table 6. Ligands and receptors of TGF- $\beta$  pathway.

| Receptor type     | Ligands                                                                              |
|-------------------|--------------------------------------------------------------------------------------|
| Type I receptor   |                                                                                      |
| ALK1/ACVRL1       | TGF- $\beta$ , BMP9 and BMP10                                                        |
| ALK2/ACVR1        | BMPs and GDFs                                                                        |
| ALK3/BMPR1A       | BMPs                                                                                 |
| ALK4/ACVR1B       | Activins, GDF8/myostatin and GDF11                                                   |
| ALK5/TGFBRI       | TGF- $\beta$ s, GDF/myostatin and GDF11                                              |
| ALK6/BMPR1B       | BMPs                                                                                 |
| ALK7/ACVR1C       | BMP16/nodal                                                                          |
| Type II receptor  |                                                                                      |
| TGFBRII/TBRII     | TGF- $\beta$ s                                                                       |
| BMPRII/BMPRII     | BMPs and GDFs                                                                        |
| ACVR2/ActRII      | Activins, BMPs and GDFs                                                              |
| ACVR2B/ActRII     | Activins, BMPs and GDFs and BMP16/nodal                                              |
| AMHRII/AMHRII     | MIF                                                                                  |
| Type III receptor |                                                                                      |
| Betaglycan        | TGF- $\beta$ 1, TGF- $\beta$ 2, TGF- $\beta$ 3, Activin-A, BMP2, BMP4, BMP7 and GDF5 |
| Endoglin          | TGF- $\beta$ 1, TGF- $\beta$ 3, Activin-A, BMP2, BMP7 and BMP9                       |

Supplementary table 7. Up-regulated genes in response to TGF- $\beta$  pathway.

| Genes | Gene names                                                                                                                                                                                                                                                                                                                                                                           |
|-------|--------------------------------------------------------------------------------------------------------------------------------------------------------------------------------------------------------------------------------------------------------------------------------------------------------------------------------------------------------------------------------------|
|       | APC, ARID4B, BCAR3, BMP2, BMPRI1A, BMPRI2, CDH1, CDK9, CDKN1C, CTNNB1, ENG, FKBP1A, FNTA, FURIN, HDAC1, HIPK2, ID1, ID2, ID3, IFNGR2, JUNB, KLF10, LEFTY2, LTBP2, MAP3K7, NCOR2, NOG, PMEPA1, PPM1A, PPP1CA, PPP1R15A, RAB31, RHOA, SERPINE1, SKI, SKIL, SLC20A1, SMAD1, SMAD3, SMAD6, SMAD7, SMURF1, SMURF2, SPTBN1, TGFB1, TGFBRI, TGIF1, THBS1, TJP1, TRIM33, UBE2D3, WWTR1, XIAP |

Supplementary table 8. The reproducibility of ST data across six patient donors through irreproducible discovery rate (IDR) analysis.

| Cell type    | Cell subtype                  | Group | Marker gene | Irreproducible Discovery Rate |
|--------------|-------------------------------|-------|-------------|-------------------------------|
| Cancer cells | TM4SF1+ cancer cells (Epi-C0) | AIS   | TM4SF1      | 0.001465066                   |
|              | TM4SF1+ cancer                | MIA   | TM4SF1      | 0.984152457                   |

|                  |                   |     |        |             |
|------------------|-------------------|-----|--------|-------------|
|                  | cells (Epi-C0)    |     |        |             |
|                  | TM4SF1+ cancer    | IAC | TM4SF1 | 0.01611888  |
|                  | cells (Epi-C0)    |     |        |             |
|                  | CRABP2+           |     |        |             |
|                  | cancer cells      | AIS | CRABP2 | 0.874261321 |
|                  | (Epi-C3)          |     |        |             |
|                  | CRABP2+           |     |        |             |
|                  | cancer cells      | MIA | CRABP2 | 0.920942293 |
|                  | (Epi-C3)          |     |        |             |
|                  | CRABP2+           |     |        |             |
|                  | cancer cells      | IAC | CRABP2 | 0.478043675 |
|                  | (Epi-C3)          |     |        |             |
|                  | UBE2C+ cancer     | AIS | UBE2C  | 0.8686264   |
|                  | cells (Epi-C6)    |     |        |             |
|                  | UBE2C+ cancer     | MIA | UBE2C  | 0.968448944 |
|                  | cells (Epi-C6)    |     |        |             |
|                  | UBE2C+ cancer     | IAC | UBE2C  | 0.62342401  |
|                  | cells (Epi-C6)    |     |        |             |
| Lymph            | T/NK              | AIS | CD3D   | 0.780143153 |
|                  | T/NK              | MIA | CD3D   | 0.926281547 |
|                  | T/NK              | IAC | CD3D   | 0.409710723 |
|                  | B cells           | AIS | CD79A  | 0.3044021   |
|                  | B cells           | MIA | CD79A  | 0.882320403 |
|                  | B cells           | IAC | CD79A  | 0.495937474 |
| Stromal          | Endothelial cells | AIS | CLDN5  | 0.93870687  |
|                  | Endothelial cells | MIA | CLDN5  | 0.79757546  |
|                  | Endothelial cells | IAC | CLDN5  | 0.851591735 |
|                  | Fibroblast        | AIS | COL1A1 | 0.021762812 |
|                  | Fibroblast        | MIA | COL1A1 | 0.780095108 |
|                  | Fibroblast        | IAC | COL1A1 | 0.254921785 |
| Epithelial cells | AT1               | AIS | AGER   | 5.59E-08    |
|                  | AT1               | MIA | AGER   | 0.003351366 |
|                  | AT1               | IAC | AGER   | 0.001500678 |
|                  | AT2               | AIS | SFTPC  | 6.76E-08    |
|                  | AT2               | MIA | SFTPC  | 0.013318399 |
|                  | AT2               | IAC | SFTPC  | 2.37E-05    |

## Supplementary figures

### Supplementary Fig.1. Clinical characteristics and cell type

identification of LUAD within three pathological stages, related with

**Fig. 1.**

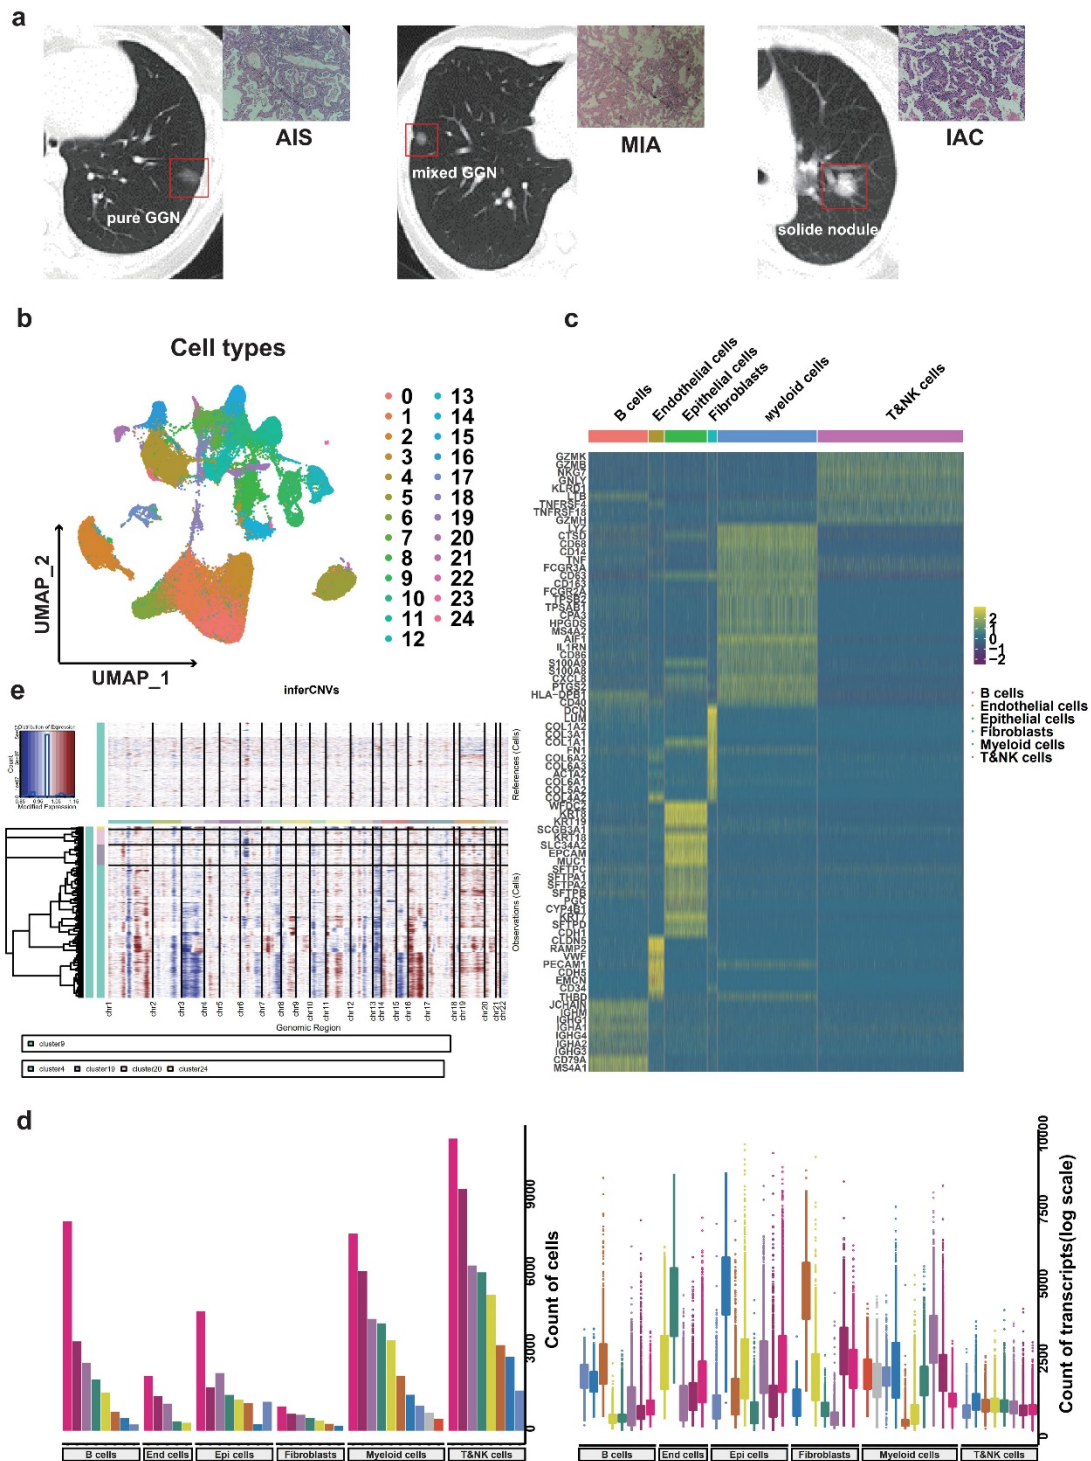

(a) Radiological and pathological features of enrolled cases (left panel: AIS represented by TD8, middle panel: MIA represented by TD3, right panel: IAC represented by TD1); (b) UMAP plot exhibit 25 cell type clusters with high confidence from all nine patients by scRNA-seq; (c) Heat map exhibit marker genes of six dominant cell types from scRNA-seq, the details of marker genes were listed in Table 4.d; (d) Quantity display of number cell (by histogram, left panel) and transcripts (by box diagram, right panel) of each subcluster from all patients in

scRNA-seq data; (e) CNV atlas of cancer cell and normal epithelial cells in LUAD by scRNA-seq. Cluster 4 and Cluster 24 are identified as cancer cells, Cluster 19 and Cluster 20 are identified as normal epithelial cells.

**Supplementary Fig.2. Duplicate results for cell type clustering.**

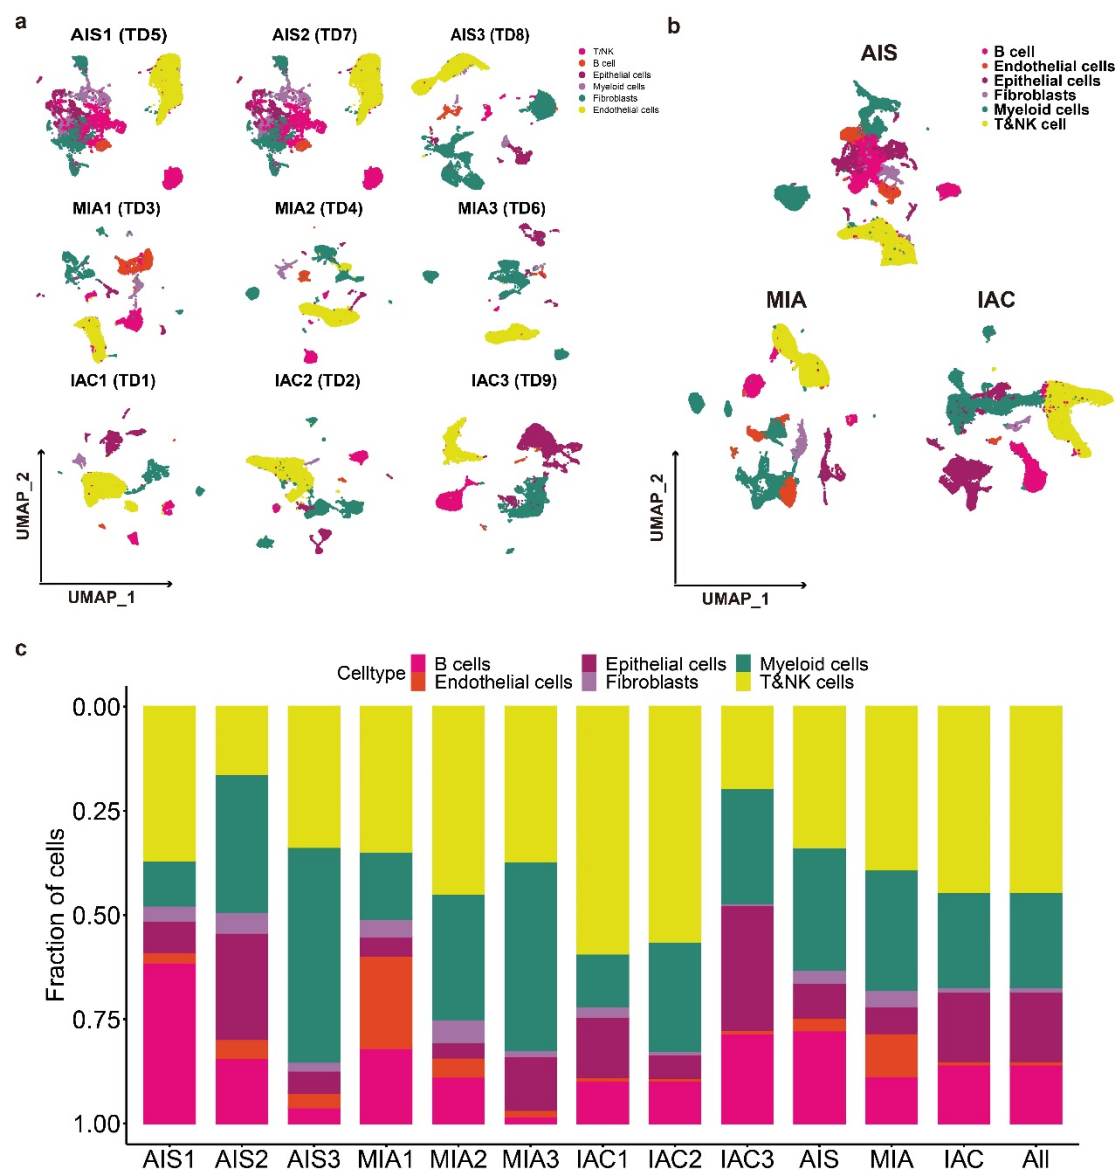

(a) Cell type clustering for each patient in all nine patients; (b) Cell type clustering in three stages of LUAD; (c) Distribution of major cell types in three stages and in each patient of LUAD.

**Supplementary Fig.3. Correlation analysis of cellular components from scRNA-seq data.**

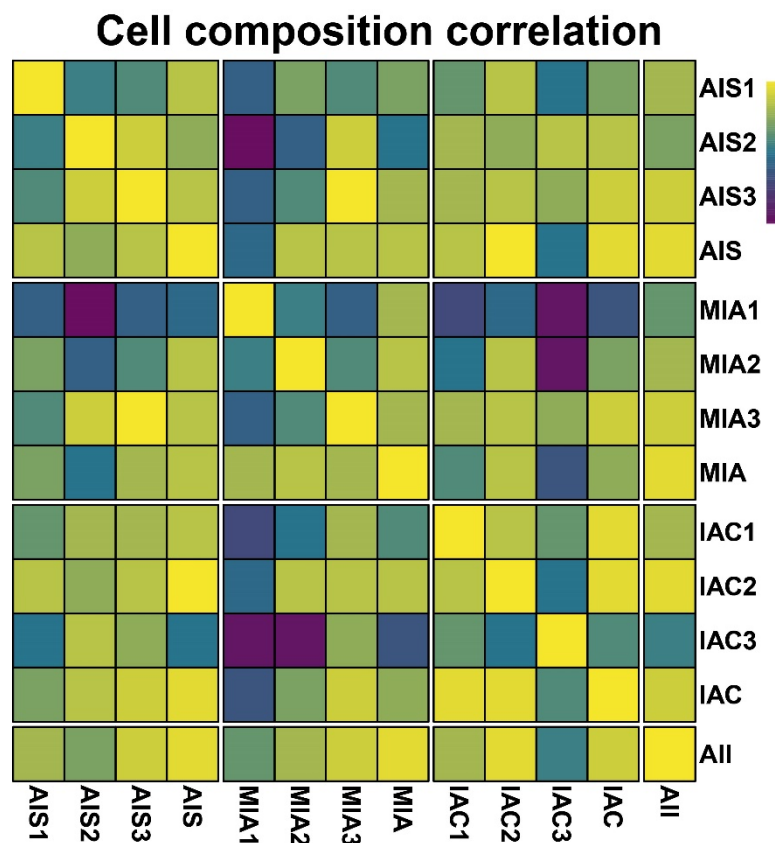

**Supplementary Fig.4. Polyclonal origins of cancer cells, related with Fig. 2.**

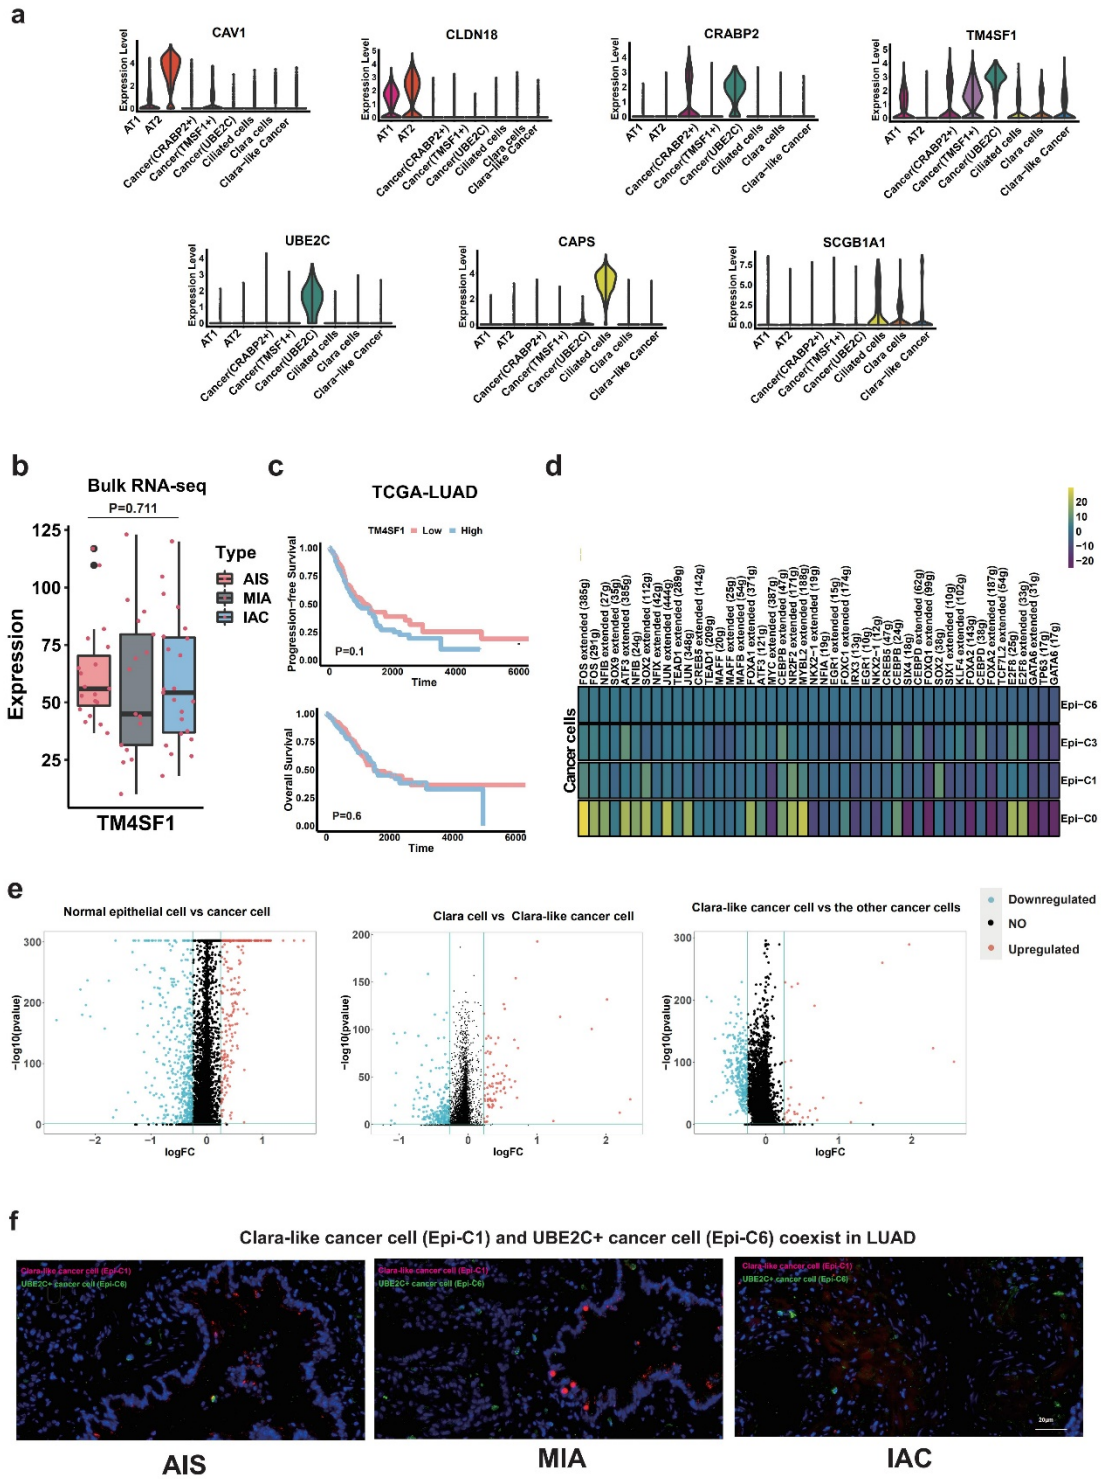

(a) Violin diagram reveal marker genes of four sub-clusters of normal epithelial cells and four sub-clusters of cancer cells. SCGB1A1 is common marker gene of Clara cell and Clara cell-like cancer cell; (b) Bulk RNA-seq validated that the expression level of the TM4SF1 gene increased in the process of cancer invasion; (c) Survival analysis of different TM4SF1 expression levels in lung adenocarcinoma, from TCGA database; (d) Heat map of the SCENIC results showing the area under the curve (AUC) (enrichment score) for the regulation of TF expression for each kind of tumor

cell sub-cluster; (e) Volcano maps show comparisons of DEGs of Clara-like cancer cells and the other cancer cells from scRNA-seq data. The other normal epithelia cells (Epi-C2, Epi-C4, Epi-C5) vs the other cancer cells (Epi-C0, Epi-C3, Epi-C6); Clara cells (Epi-C7) vs Clara-like cancer cells (Epi-C1), Clara-like cancer cells (Epi-C1) vs the other cancer cells (Epi-C0, Epi-C3, Epi-C6). Blue represent downregulated DEGs, black represent no DEGs, red represent upregulated DEGs; (f) IF staining exhibit coexistence of Clara-like cancer (Epi-C1) and UBE2C (Epi-C6) with three pathological stages in LUAD. Red: Clara-like cancer (Epi-C1); Green: UBE2C (Epi-C6).

**Supplementary Fig.5. Decrease of MALT B cells (B-C4: IGHD) drive invasion of LUAD, related with Fig. 4.**

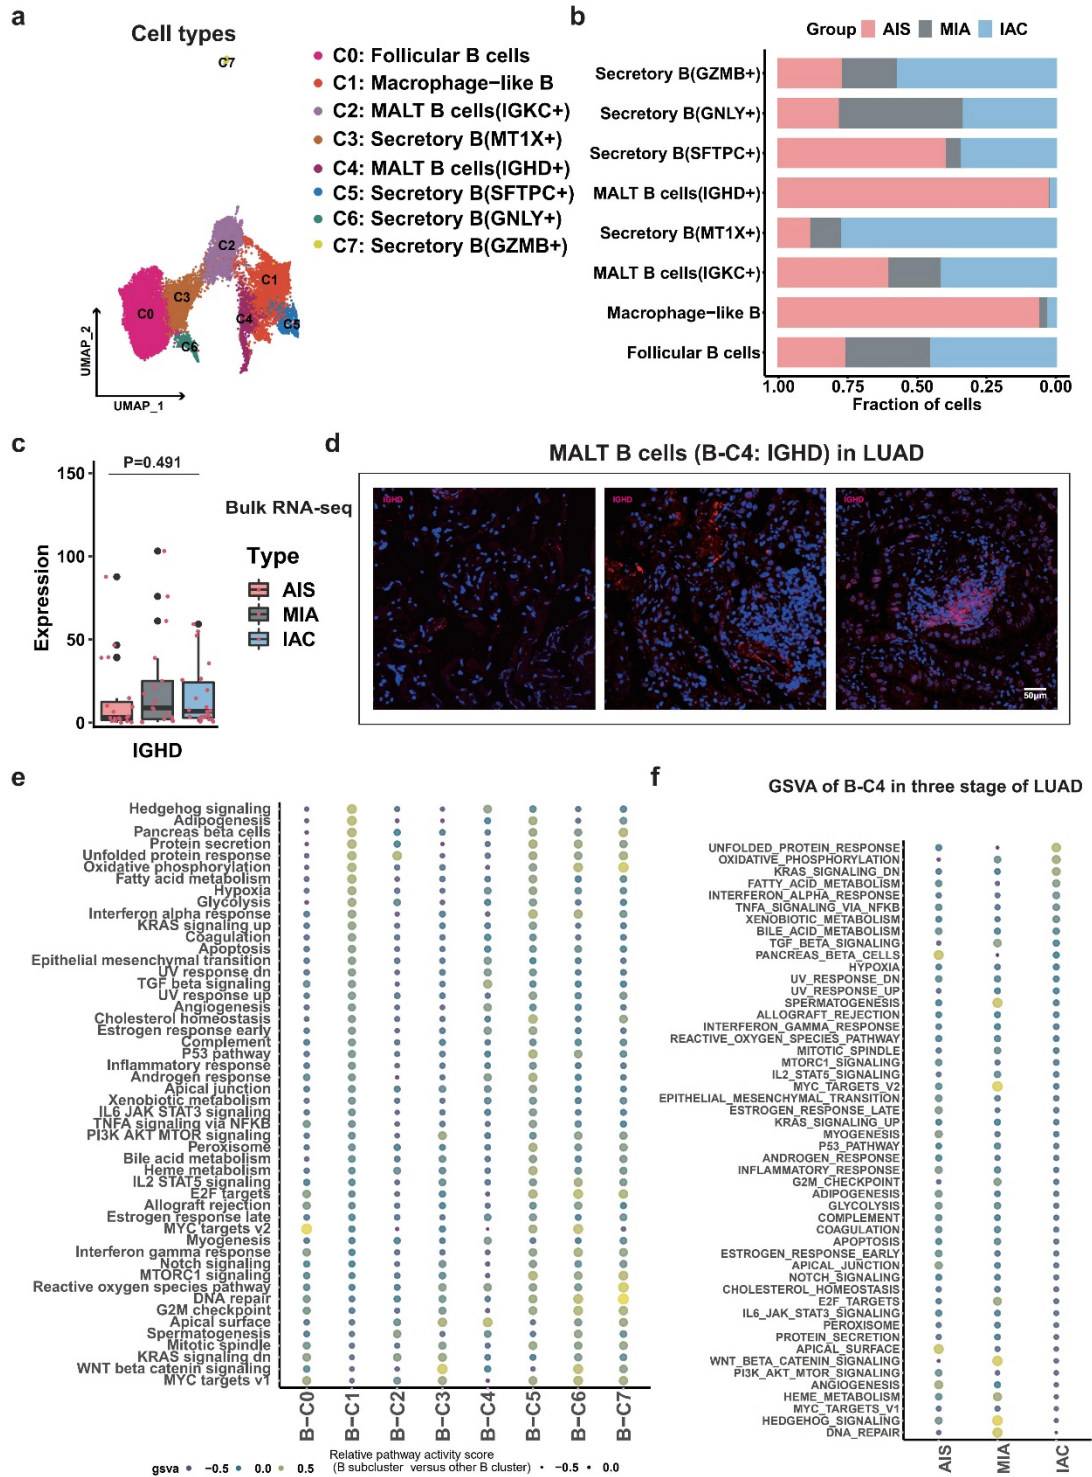

(a) U-MAP of scRNA-seq exhibit eight sub-clusters of B cells from 18,467 cells; (b) Proportions of eight sub-clusters of B cells distributing in three pathological stages of LUAD; (c) Bulk RNA-seq confirm that IGHD expression levels in three stages of LUAD; (d) IF validate that protein expression level of IGHD gradually decreased in the process of cancer invasion in LUAD; (e) Bubble diagram of GSVA exhibit the pathway activity score in each subtype of B cell; (f) Heatmap of GSVA results

showing distinct signaling pathways of MALT B cells (B-C4: IGHD) in three stages of lung adenocarcinoma

Supplementary Fig.6. Decrease of lymphatic endothelial cells  
(End-C4: PDPN) mediates the invasion of LUAD, related with Fig. 4.

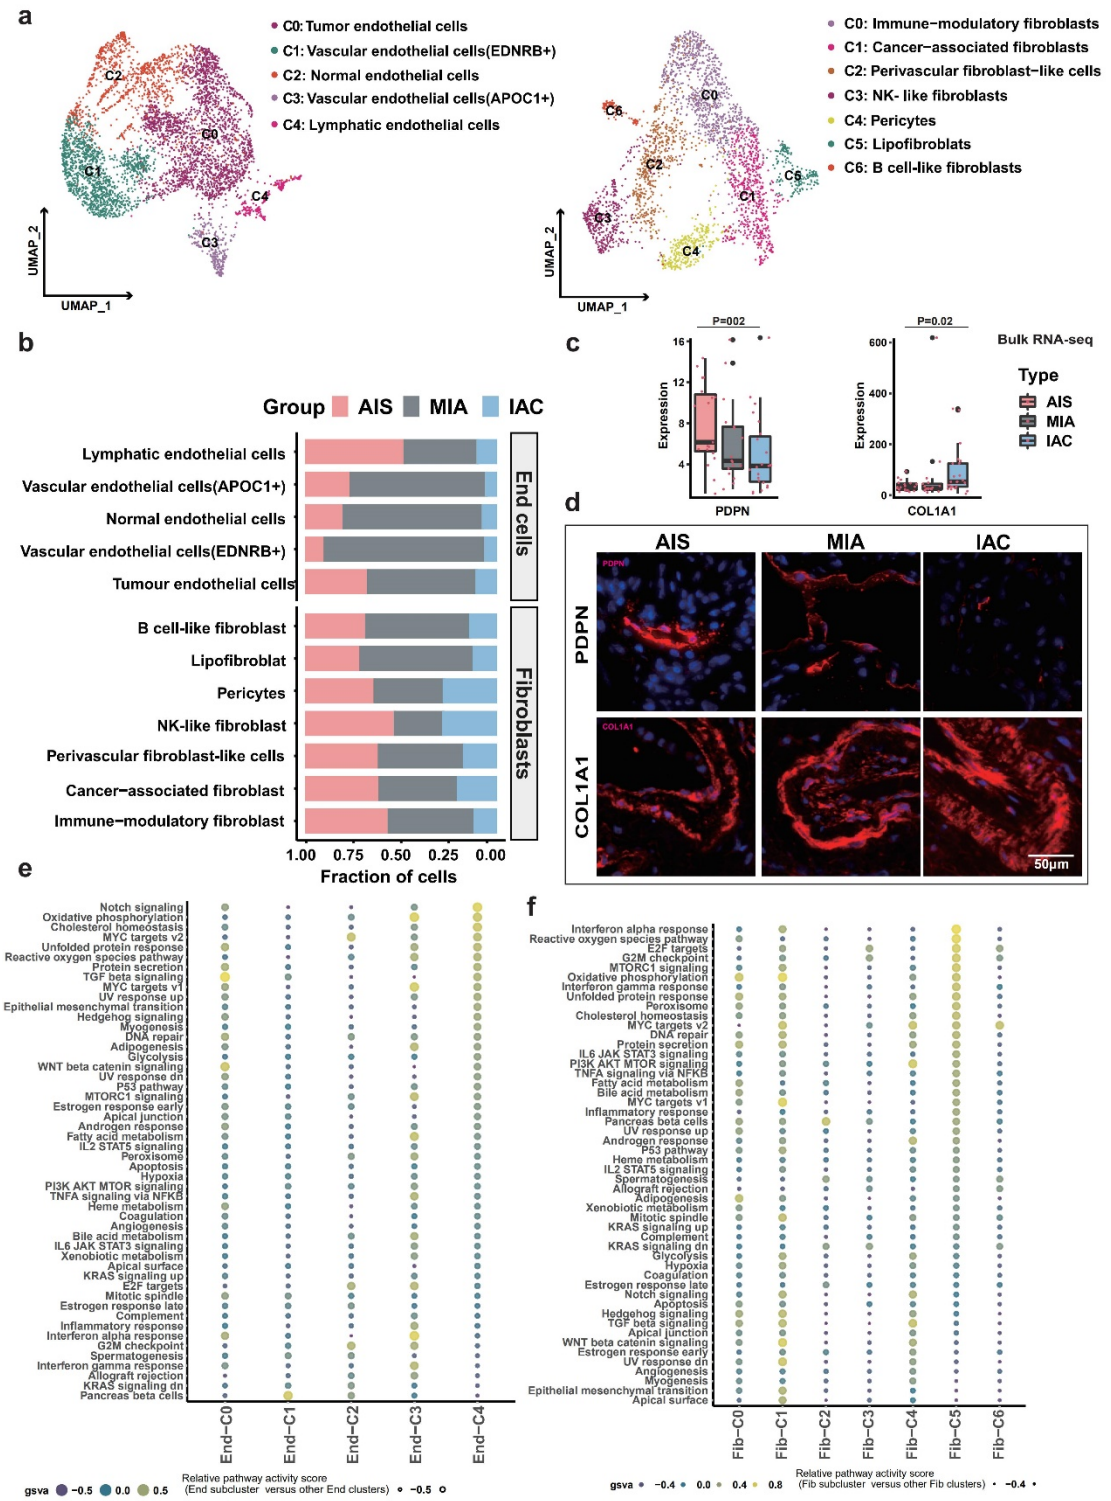

(a) UMAP of scRNA-seq exhibits sub-clusters of endothelial cells (left panel, 4,739

cells, 5 cell subtypes) and fibroblasts (right panel, 2,922 cells, 7 cell subtypes); (b) Proportions of five sub-clusters of endothelial cells (top) and seven sub-clusters of fibroblasts (bottom) distributed in three pathological stages of LUAD; (c) Bulk RNA-seq confirms that the expression level of PDPN gene (marker gene of lymphatic endothelium) gradually decreased from AIS to MIA and then to IAC (left panel), yet COL1A1 gene (marker gene of fibroblasts) show enrich in MIA; (d) IF validate that protein expression level of PDPN gene gradually decreased in the process of cancer invasion in LUAD, however COL1A1 gene show reverse trend; (e) Bubble diagram of GSVA exhibit the pathway activity score in each type of endothelial cell sub-clusters; (f) Bubble diagram of GSVA exhibit the pathway activity score in each type of fibroblasts sub-clusters.

**Supplementary Fig.7. The reproducibility of gene expression for each major cell type through Wilcoxon on test for each individual patient.**

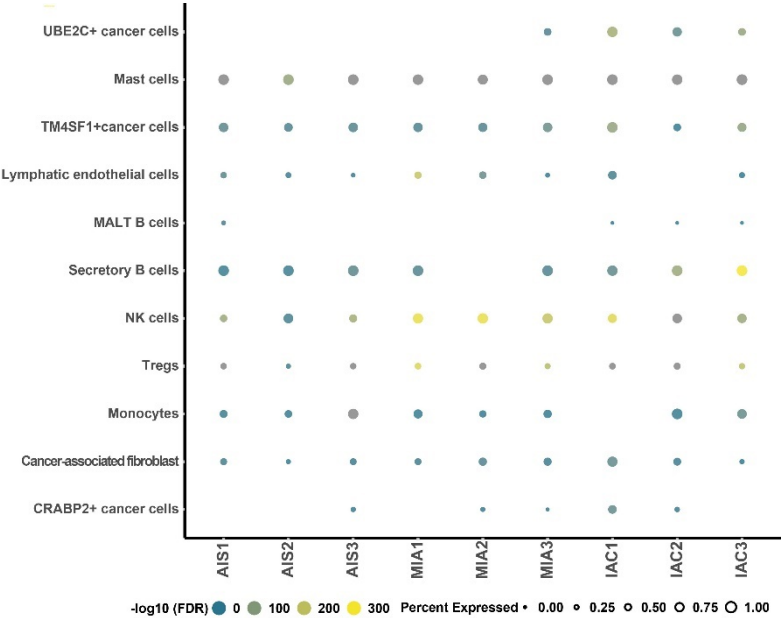

**Supplementary Fig.8. Prediction of the interaction of receptors and ligands in cancer cells and TME cells.**



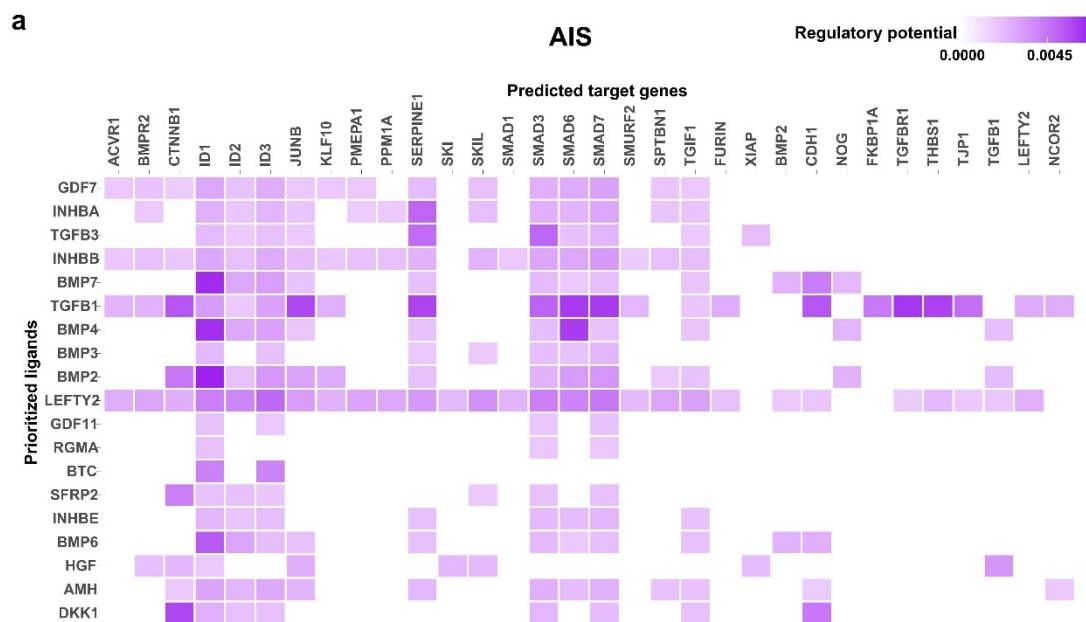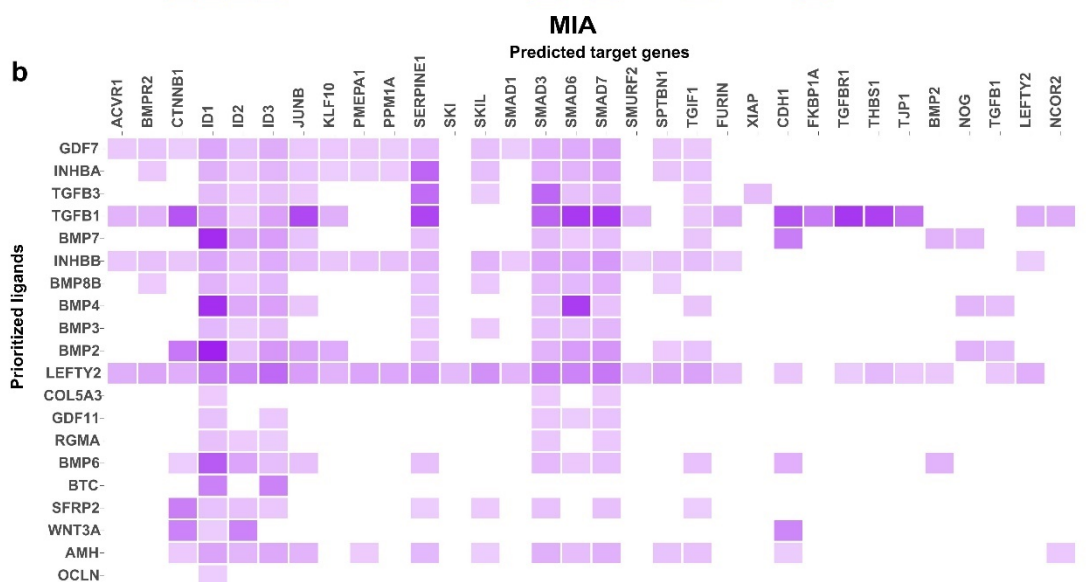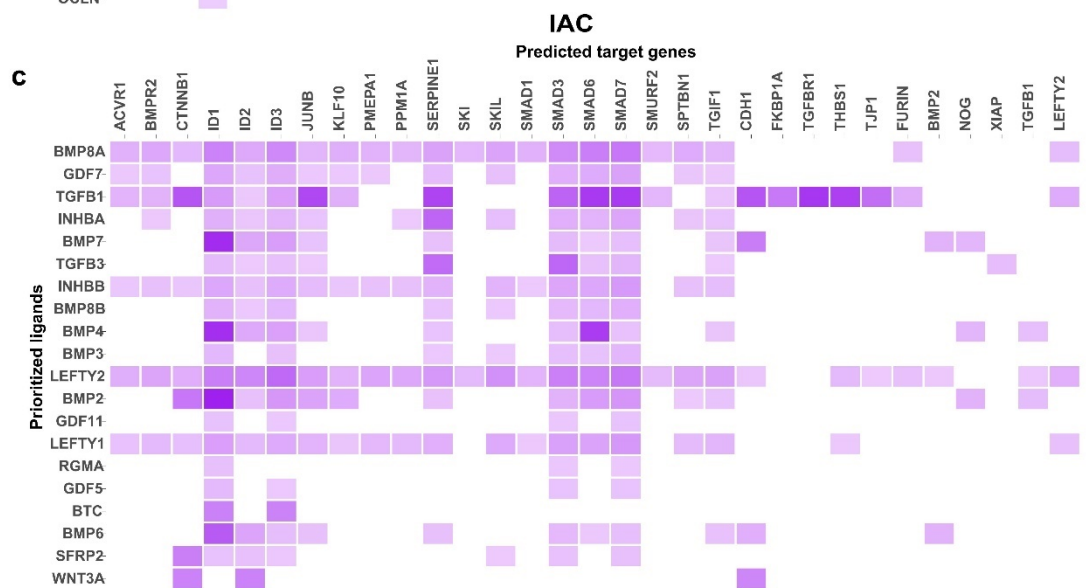

(a) The predicted target genes in AIS are predicted by NicheNet; (b) The predicted target genes in MIA are predicted by NicheNet; (c) The predicted target genes in IAC predicted by NicheNet.

**Supplementary Fig.10. Correlation analysis of the number of spots in each region from ST data.**

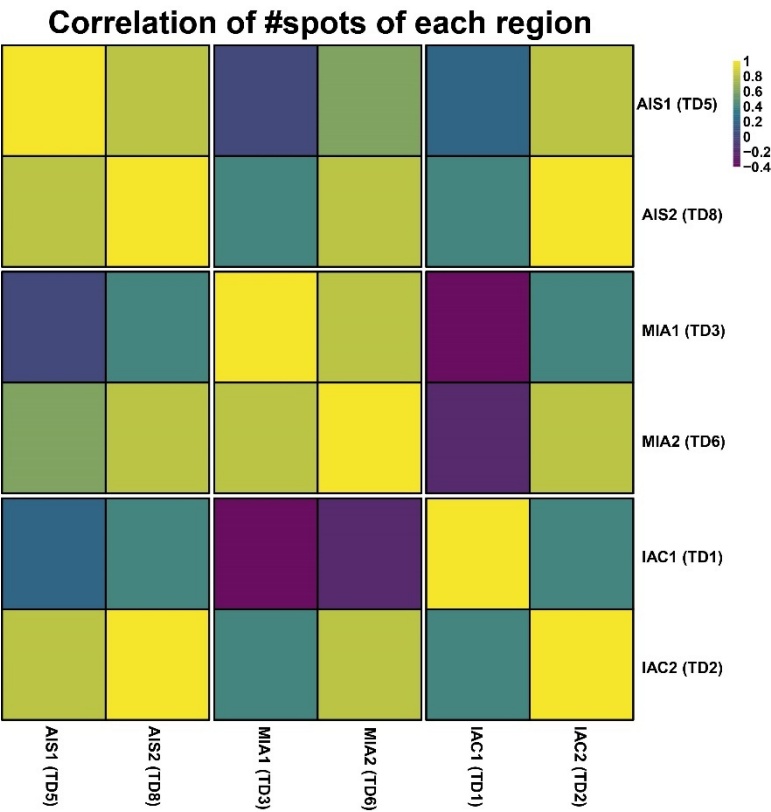

**Supplementary Fig.11. Analysis of cellular spatial distribution and integration of single cell data in three pathological stages of LUAD, related with Fig. 6.**



region.

**Supplementary Fig.12. Cell types of each spatial spot for three stages of LUAD (TD8, TD3, and TD1) revealed by RCTD.**

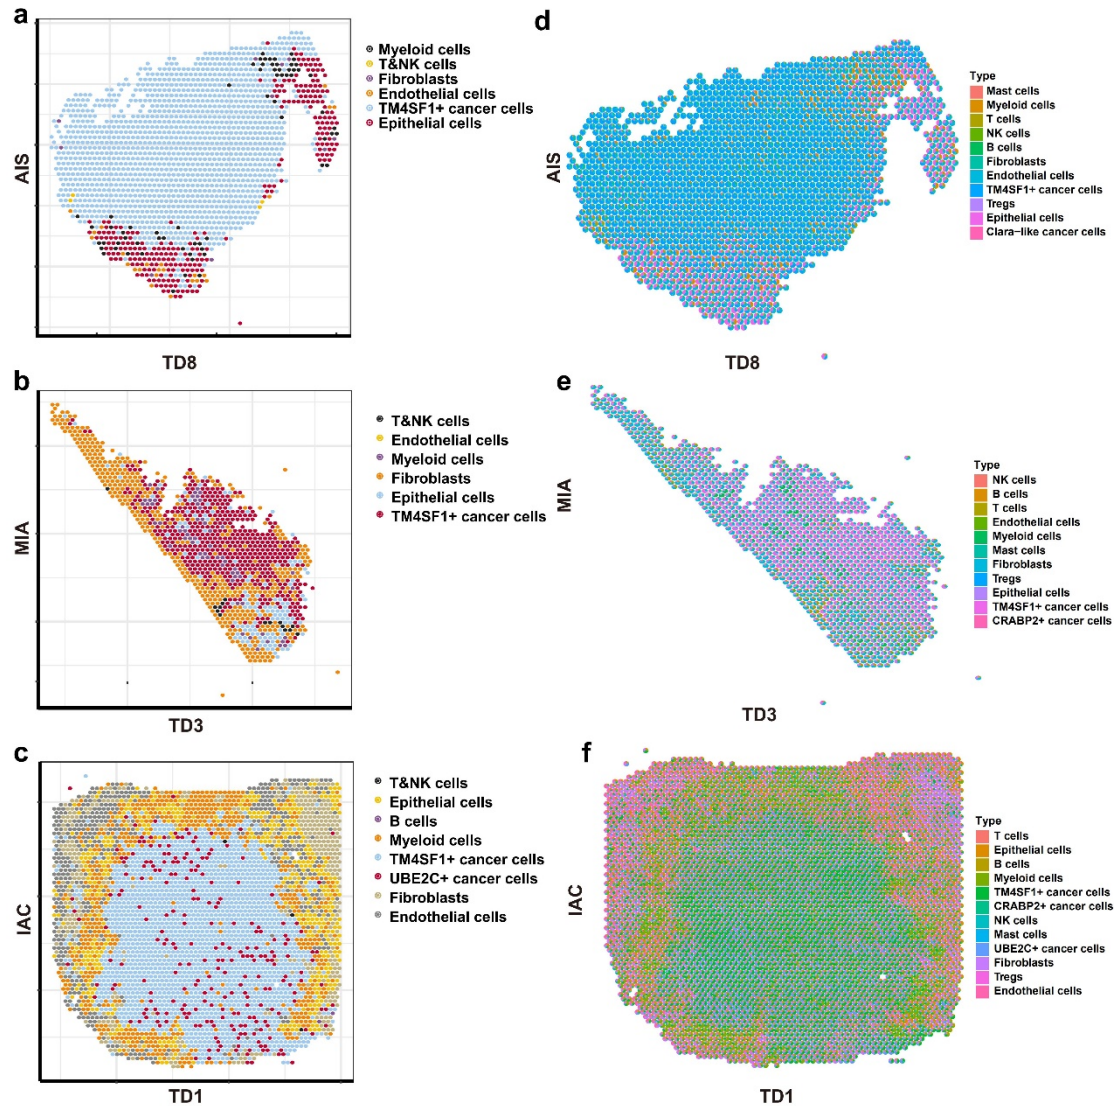

Major cell types in each spatial spot for AIS (TD8, a), MIA (TD 3, b), and IAC (TD 1, c); Pie chart of cell types in each spatial spot for AIS (d), MIA (e), and IAC (f).

**Supplementary Fig.13. Cell types of each spatial spot for three stages of LUAD (TD5, TD6, and TD2) revealed by RCTD.**

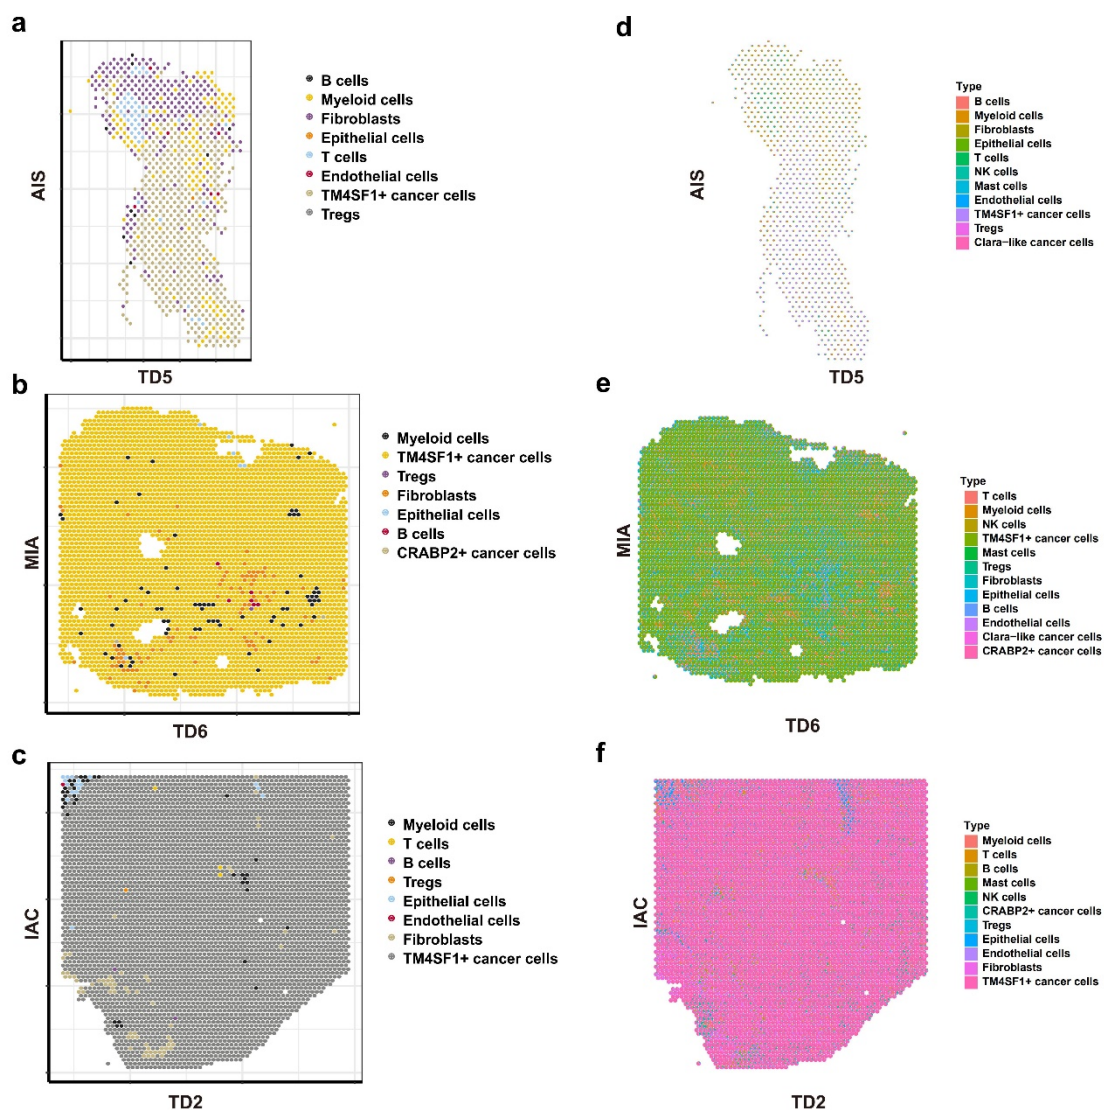

Major cell types in each spatial spot for AIS (TD5, a), MIA (TD 6, b), and IAC (TD 2, c); Pie chart of cell types in each spatial spot for AIS (d), MIA (e), and IAC (f).

**Supplementary Fig.14. Prediction of major cell types in LUAD based on each spatial spot by using Cell-ID.**

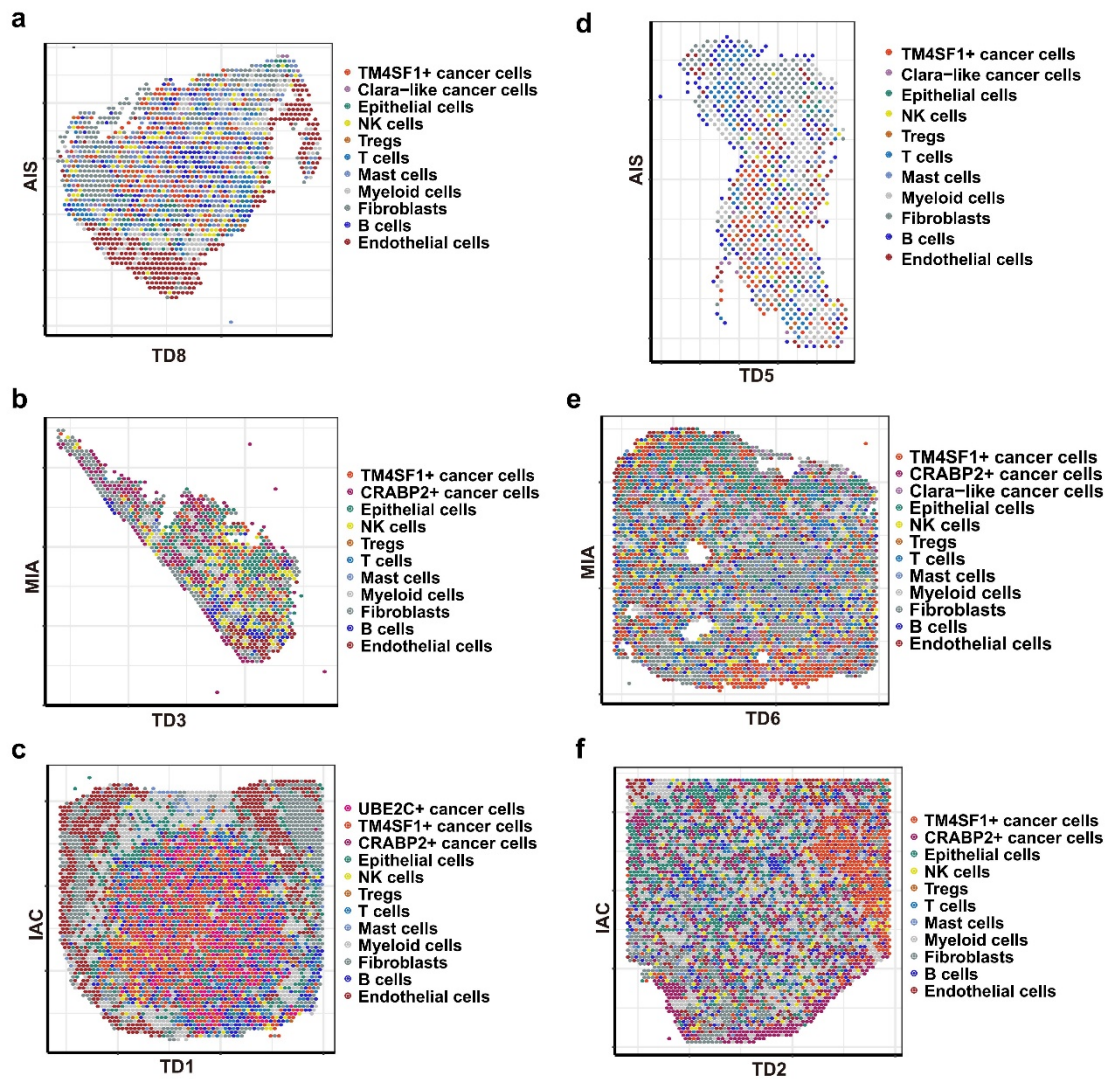

Cell types in the spatial spot of AIS (a, d), MIA (b, e) and IAC (c, f).

**Supplementary Fig.15. Spatial differentiation trajectories of LUAD.**

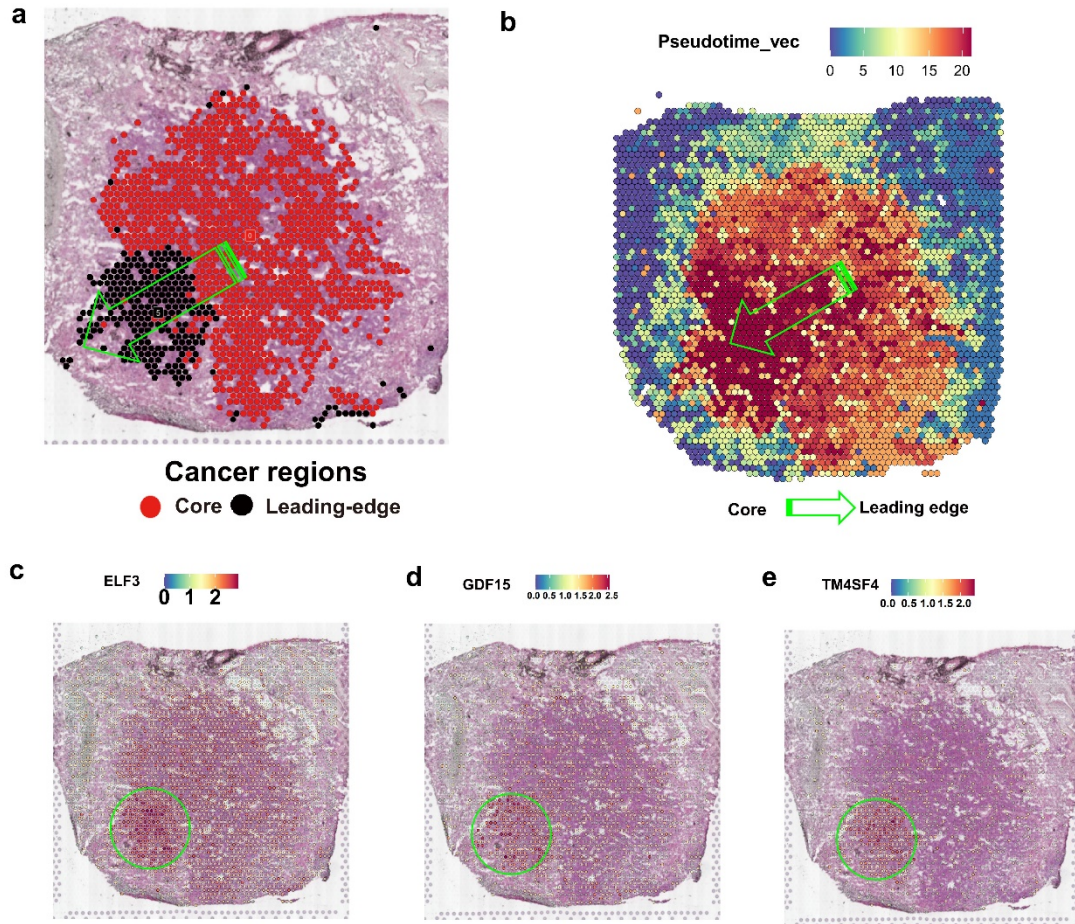

(a) ST analysis is used to sub-regionalize the cancer region; (b) The pseudo-time analysis of different regions (edge and core) of the tumor using SPAPA; Key marker gene of the leading edge were ELF3(c), GDF15 (d), and TM4SF4 (e).

**Supplementary Fig.16. Spatial transcriptome and re-clustering of cancer cells, related with Fig. 7.**

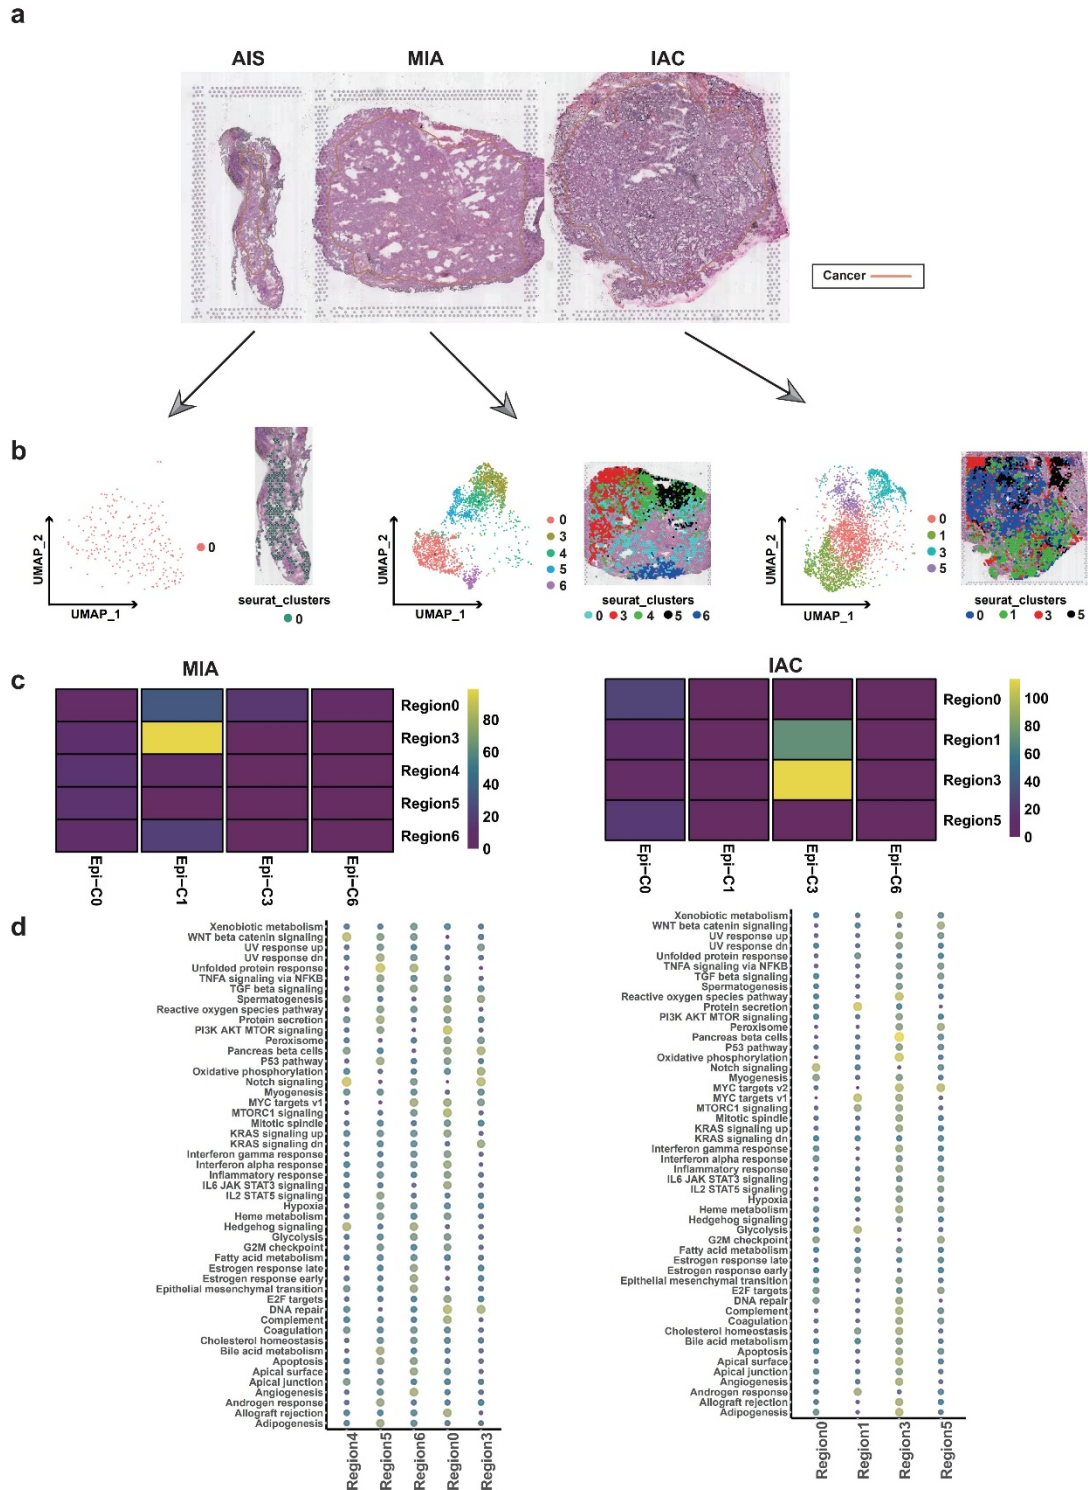

(a) HE staining exhibit the histological cancer subregions of AIS (left panel, TD5), MIA (middle panel, TD6) and IAC (right panel, TD2); (b) UMAP plot exhibit varieties of cancer subregions in HE-stained cancer region by ST; (c) Heat maps showing four cancer subclusters (Epi-C0, Epi-C1, Epi-C3, Epi-C6) obtained upon hyper-geometric distribution analysis of all specific cell types identified by scRNA-seq analysis and regions defined by ST analysis (left panel: MIA represented by TD6, right panel: IAC represented by TD2); (d) Bubble diagram of GSVA exhibit

the pathway activity score in each type of spatial subregion (left panel: MIA represented by TD6, right panel: IAC represented by TD2).
